# Supplementary material for: Programmatic Cost-Effectiveness of a Second-Time Visit to Detect New Tuberculosis and Diabetes Mellitus in TB Contact Tracing in Myanmar
Source: MDPI journal article supplement (doi:10.3390/ijerph192316090), 2022-12-01
Supplement: s1 [file s1]

## Additional files

### SUPPLEMENTARY TABLES

**Table S1** Activities in contact tracing according to Myanmar National Tuberculosis Programme guideline, World Health Organization (WHO), and our current research

| Activities                                  | Contact tracing (NTP guideline) | WHO Recommendation | Our current research         |
|---------------------------------------------|---------------------------------|--------------------|------------------------------|
| First home visit                            |                                 |                    |                              |
| - Signs and symptoms screening              | +                               | +                  | +                            |
| - RBG test                                  | +                               | +                  | +                            |
| - Provide health education                  | +                               | +                  | +                            |
| - Counselling to go to township TB clinic   |                                 |                    |                              |
| for:                                        | Nil                             | All contacts       | All contacts                 |
| o CXR                                       | Only for SS (+) ve              | Nil                | Nil                          |
| o Sputum smear                              | Nil                             | Nil                | +                            |
| o FBG test for contacts $\geq 25$ years old |                                 |                    |                              |
| Tests taken in township TB clinic           |                                 |                    |                              |
| - FBG test for contacts $\geq 25$ years old | Nil                             | Nil                | Contacts $\geq 25$ years old |
| - CXR                                       | For smear (-) ve but SS (+) ve  | +                  | +                            |
| - GeneXpert test                            | For newly diagnosed TB          | +                  | +                            |

| Activities                                                                                                                                                                                      | Contact tracing (NTP guideline) | WHO Recommendation | Our current research |
|-------------------------------------------------------------------------------------------------------------------------------------------------------------------------------------------------|---------------------------------|--------------------|----------------------|
| Second home visit for household contacts did not come to TB clinic within two weeks                                                                                                             |                                 |                    |                      |
| - FBG test for contacts $\geq 25$ years old                                                                                                                                                     | Nil                             | Nil                | +                    |
| - Repeated health education                                                                                                                                                                     | Nil                             | Nil                | +                    |
| - Repeated counselling to take CXR in township TB clinic                                                                                                                                        | Nil                             | Nil                | +                    |
| Diagnosis of TB                                                                                                                                                                                 |                                 |                    |                      |
| Bacterial confirmation                                                                                                                                                                          |                                 |                    |                      |
| - Sputum smear                                                                                                                                                                                  | +                               | Nil                | Nil                  |
| - GeneXpert                                                                                                                                                                                     | Nil                             | +                  | +                    |
| CXR positive not cleared by two weeks of antibiotics among those who could not produce sputum (or) GeneXpert negative                                                                           | +                               | +                  | +                    |
| <i>NTP</i> National Tuberculosis Programme, <i>RBG</i> random blood glucose test, <i>TB</i> tuberculosis, <i>CXR</i> chest X-ray, <i>SS</i> sputum smear, <i>FBG</i> fasting blood glucose test |                                 |                    |                      |

**Table S2** Cost estimates for capital and overhead costs

| Item                                | Total number of tests<br>(T) | Cost (USD)<br>(C) | Annualizing factor<br>(A)       | Cost per test (USD)<br>(C/(T×A)) |
|-------------------------------------|------------------------------|-------------------|---------------------------------|----------------------------------|
| <b>CXR examination</b>              |                              |                   |                                 |                                  |
| <i>Capital cost</i>                 |                              |                   |                                 |                                  |
| Building space                      | 9261 CXRs were taken in 2018 | 37,550            | 25.73 (50 years of useful life) | 0.16                             |
| Digital CXR with portable generator | 9261 CXRs were taken in 2018 | 115,523           | 8.53 (10 years of useful life)  | 1.46                             |
| <i>Overhead cost</i>                |                              |                   |                                 |                                  |
| Maintenance for quality control     | 9261 CXRs were taken in 2018 | 1,653             | -                               | 0.179                            |
| Electricity                         | 9261 CXRs were taken in 2018 | 550               | -                               | 0.059                            |
| <b>GeneXpert test</b>               |                              |                   |                                 |                                  |
| <i>Capital cost</i>                 |                              |                   |                                 |                                  |
| Building space                      | 2075 tests in 2018           | 6,328             | 25.73 (50 years of useful life) | 0.118                            |
| GeneXpert module with computer      | 2075 tests in 2018           | 18,740            | 8.53 (10 years of useful life)  | 1.059                            |
| <i>Overhead cost</i>                |                              |                   |                                 |                                  |
| Calibration                         | 2075 tests in 2018           | 550               | -                               | 0.265                            |
| Electricity                         | 2075 tests in 2018           | 550               | -                               | 0.265                            |
| <b>Glucometer</b>                   |                              |                   |                                 |                                  |
| <i>Overhead cost</i>                | 617 tests                    | 316.26            | -                               | 0.513                            |

USD US dollars, CXR chest X-ray,

**Table S3** Model input probabilities for parameters used in Monte Carlo simulation

| Parameter                                                        | Base case | Distribution | Confidence interval |        |
|------------------------------------------------------------------|-----------|--------------|---------------------|--------|
|                                                                  |           |              | Low                 | High   |
| Compliance to screening after home visit                         |           |              |                     |        |
| Full compliance to screening after 1 <sup>st</sup> home visit    | 42.6%     | Beta         | 31.8%               | 54.8%  |
| Partial compliance to screening after 1 <sup>st</sup> home visit | 3.3%      | Beta         | 0.1%                | 25.0%  |
| Full compliance to screening after 2 <sup>nd</sup> home visit    | 65.0%     | Beta         | 53.2%               | 75.3%  |
| Partial compliance to screening after 2 <sup>nd</sup> home visit | 18.2%     | Beta         | 8.9%                | 29.9%  |
| Cost (USD)                                                       |           |              |                     |        |
| Cost for first home visit                                        | 1.240     | Gamma        | 1.076               | 1.432  |
| Cost for second home visit                                       | 1.273     | Gamma        | 1.117               | 1.437  |
| Cost for RBG/FBG test                                            | 1.103     | Gamma        | 0.974               | 1.256  |
| Cost for chest X-ray                                             | 4.781     | Gamma        | 3.462               | 6.376  |
| Cost for GeneXpert                                               | 15.038    | Gamma        | 8.709               | 22.511 |
| DALY averted                                                     |           |              |                     |        |
| TB                                                               | 1.800     | Gamma        | 1.531               | 2.146  |
| DM                                                               | 0.038     | Gamma        | 0.037               | 0.039  |

*USD* US dollars, *RBG* random blood glucose test, *FBG* fasting blood glucose test,

*DALY* disability-adjusted life years, *TB* tuberculosis, *DM* diabetes mellitus

**Table S4** Comparison of total costs between screening of TB and DM after first home visit versus second home visit

| Activity                                          | Quantity | Time spent<br>in hours per<br>household<br>contacts | Cost per<br>hour (USD) | Cost per<br>quantity<br>(USD) | Total cost<br>for first<br>visit (USD) | Total cost<br>for second<br>home visit<br>(USD) | Total cost<br>for two<br>home visits<br>(USD) |
|---------------------------------------------------|----------|-----------------------------------------------------|------------------------|-------------------------------|----------------------------------------|-------------------------------------------------|-----------------------------------------------|
| <b>Training for volunteers</b>                    |          |                                                     |                        |                               |                                        |                                                 |                                               |
| Per diem for<br>volunteers                        | 8        | ≠                                                   | ≠                      | 3.77                          | 30.12                                  | ≠                                               | 30.12                                         |
| Per diem for trainers                             | 2        | ≠                                                   | ≠                      | 11.30                         | 22.59                                  | ≠                                               | 22.59                                         |
| Refreshers                                        | 10       | ≠                                                   | ≠                      | 3.77                          | 37.65                                  | ≠                                               | 37.65                                         |
| Travel cost                                       | 10       | ≠                                                   | ≠                      | 1.13                          | 11.30                                  | ≠                                               | 11.30                                         |
| Printing                                          | 10       | ≠                                                   | ≠                      | 0.75                          | 7.53                                   | ≠                                               | 7.53                                          |
| <b>First home visit</b>                           |          |                                                     |                        |                               |                                        |                                                 |                                               |
| Telephone call                                    | 193      | 0.05                                                | 1.13                   | 0.06                          | 10.89                                  | ≠                                               | 10.89                                         |
| Home visit for<br>contact tracing by<br>volunteer | 193      | 2                                                   | 1.03                   | 2.06                          | 397.58                                 | ≠                                               | 397.58                                        |
| Travel cost for<br>volunteer                      | 193      | ≠                                                   | ≠                      | 1.13                          | 218.00                                 | ≠                                               | 218.00                                        |
| Masks                                             | 519      | ≠                                                   | ≠                      | 0.04                          | 28.05                                  | ≠                                               | 28.05                                         |
| <b>Home-based RBG test</b>                        |          |                                                     |                        |                               |                                        |                                                 |                                               |
| Glucometer                                        | 313      | ≠                                                   | ≠                      | 0.64                          | 200.93                                 | ≠                                               | 200.93                                        |
| Glucose strip                                     | 313      | ≠                                                   | ≠                      | 0.38                          | 117.85                                 | ≠                                               | 117.85                                        |

| Activity                                          | Quantity | Time spent<br>in hours per<br>household<br>contacts | Cost per<br>hour (USD) | Cost per<br>quantity<br>(USD) | Total cost<br>for first<br>visit (USD) | Total cost<br>for second<br>home visit<br>(USD) | Total cost<br>for two<br>home visits<br>(USD) |
|---------------------------------------------------|----------|-----------------------------------------------------|------------------------|-------------------------------|----------------------------------------|-------------------------------------------------|-----------------------------------------------|
| Alcohol swab                                      | 313      | ≠                                                   | ≠                      | 0.02                          | 5.66                                   | ≠                                               | 5.66                                          |
| Needle                                            | 313      | ≠                                                   | ≠                      | 0.04                          | 11.78                                  | ≠                                               | 11.78                                         |
| <b>FBG test in TB clinic after 1st home visit</b> |          |                                                     |                        |                               |                                        |                                                 |                                               |
| Duration of taking<br>FBG test                    | 127      | 0.07                                                | 1.03                   | 0.07                          | 8.76                                   | ≠                                               | 8.76                                          |
| Glucometer                                        | 127      | ≠                                                   | ≠                      | 0.64                          | 81.53                                  | ≠                                               | 81.53                                         |
| Glucose strip                                     | 127      | ≠                                                   | ≠                      | 0.38                          | 47.82                                  | ≠                                               | 47.82                                         |
| Alcohol swab                                      | 127      | ≠                                                   | ≠                      | 0.02                          | 2.30                                   | ≠                                               | 2.30                                          |
| Needle                                            | 127      | ≠                                                   | ≠                      | 0.04                          | 4.78                                   | ≠                                               | 4.78                                          |
| <b>CXR examination after 1st home visit</b>       |          |                                                     |                        |                               |                                        |                                                 |                                               |
| Building                                          | 231      | ≠                                                   | ≠                      | 0.16                          | 36.96                                  | ≠                                               | 36.96                                         |
| Digital CXR with<br>portable generator            | 231      | ≠                                                   | ≠                      | 1.46                          | 337.26                                 | ≠                                               | 337.26                                        |
| Maintenance for<br>quality control                | 231      | ≠                                                   | ≠                      | 0.18                          | 41.35                                  | ≠                                               | 41.35                                         |
| Electricity                                       | 231      | ≠                                                   | ≠                      | 0.06                          | 13.63                                  | ≠                                               | 13.63                                         |
| CXR technician                                    | 231      | 0.56                                                | 1.20                   | 0.67                          | 155.23                                 | ≠                                               | 155.23                                        |
| CXR film                                          | 231      | ≠                                                   | ≠                      | 1.24                          | 286.44                                 | ≠                                               | 286.44                                        |
| Radiologist                                       | 231      | 0.08                                                | 1.50                   | 0.12                          | 28.76                                  | ≠                                               | 28.76                                         |
| Mask                                              | 231      | ≠                                                   | ≠                      | 0.04                          | 8.70                                   | ≠                                               | 8.70                                          |

| Activity                                      | Quantity | Time spent<br>in hours per<br>household<br>contacts | Cost per<br>hour (USD) | Cost per<br>quantity<br>(USD) | Total cost<br>for first<br>visit (USD) | Total cost<br>for second<br>home visit<br>(USD) | Total cost<br>for two<br>home visits<br>(USD) |
|-----------------------------------------------|----------|-----------------------------------------------------|------------------------|-------------------------------|----------------------------------------|-------------------------------------------------|-----------------------------------------------|
| Materials use                                 | 231      | ≠                                                   | ≠                      | 0.85                          | 196.35                                 | ≠                                               | 196.35                                        |
| <b>Recheck CXR after 1st home visit</b>       |          |                                                     |                        |                               |                                        |                                                 |                                               |
| Building                                      | 50       | ≠                                                   | ≠                      | 0.16                          | 8.00                                   | ≠                                               | 8.00                                          |
| Digital CXR with<br>portable generator        | 50       | ≠                                                   | ≠                      | 1.46                          | 73.00                                  | ≠                                               | 73.00                                         |
| Maintenance for<br>quality control            | 50       | ≠                                                   | ≠                      | 0.18                          | 8.95                                   | ≠                                               | 8.95                                          |
| Electricity                                   | 50       | ≠                                                   | ≠                      | 0.06                          | 2.95                                   | ≠                                               | 2.95                                          |
| CXR technician                                | 50       | 0.56                                                | 1.20                   | 0.67                          | 33.60                                  | ≠                                               | 33.60                                         |
| CXR film                                      | 50       | ≠                                                   | ≠                      | 1.24                          | 62.00                                  | ≠                                               | 62.00                                         |
| Antibiotic                                    | 50       | ≠                                                   | ≠                      | 4.50                          | 225.00                                 | ≠                                               | 225.00                                        |
| Mask                                          | 50       | ≠                                                   | ≠                      | 0.04                          | 1.88                                   | ≠                                               | 1.88                                          |
| Radiologist                                   | 50       | 0.08                                                | 1.50                   | 0.12                          | 6.23                                   | ≠                                               | 6.23                                          |
| <b>GeneXpert testing after 1st home visit</b> |          |                                                     |                        |                               |                                        |                                                 |                                               |
| Building space                                | 32       | ≠                                                   | ≠                      | 0.12                          | 3.78                                   | ≠                                               | 3.78                                          |
| GeneXpert module<br>with computer             | 32       | ≠                                                   | ≠                      | 1.06                          | 33.89                                  | ≠                                               | 33.89                                         |
| Calibration                                   | 32       | ≠                                                   | ≠                      | 0.27                          | 8.48                                   | ≠                                               | 8.48                                          |
| Electricity                                   | 32       | ≠                                                   | ≠                      | 0.27                          | 8.48                                   | ≠                                               | 8.48                                          |
| Medical technologist                          | 32       | 1.85                                                | 1.08                   | 2.00                          | 63.94                                  | ≠                                               | 63.94                                         |

| Activity                                                                                      | Quantity | Time spent<br>in hours per<br>household<br>contacts | Cost per<br>hour (USD) | Cost per<br>quantity<br>(USD) | Total cost<br>for first<br>visit (USD) | Total cost<br>for second<br>home visit<br>(USD) | Total cost<br>for two<br>home visits<br>(USD) |
|-----------------------------------------------------------------------------------------------|----------|-----------------------------------------------------|------------------------|-------------------------------|----------------------------------------|-------------------------------------------------|-----------------------------------------------|
| Xpert testing                                                                                 | 32       | ≠                                                   | ≠                      | 11.33                         | 362.56                                 | ≠                                               | 362.56                                        |
| Mask                                                                                          | 32       | ≠                                                   | ≠                      | 0.04                          | 1.20                                   | ≠                                               | 1.20                                          |
| <b>HIV test in TB patients after 1st home visit</b>                                           |          |                                                     |                        |                               |                                        |                                                 |                                               |
| Test kit                                                                                      | 15       | ≠                                                   | ≠                      | 1.12                          | 16.80                                  | ≠                                               | 16.80                                         |
| Duration of taking<br>test                                                                    | 15       | 0.25                                                | 1.03                   | 0.26                          | 3.86                                   | ≠                                               | 3.86                                          |
| Needles                                                                                       | 15       | ≠                                                   | ≠                      | 0.04                          | 0.56                                   | ≠                                               | 0.56                                          |
| Alcohol swab                                                                                  | 15       | ≠                                                   | ≠                      | 0.02                          | 0.27                                   | ≠                                               | 0.27                                          |
| <b>Additional RBG/FBG for ascertainment of undetermined DM after two times test in clinic</b> |          |                                                     |                        |                               |                                        |                                                 |                                               |
| Glucometer                                                                                    | 5        | ≠                                                   | ≠                      | 0.64                          | 3.21                                   | ≠                                               | 3.21                                          |
| Glucose strip                                                                                 | 5        | ≠                                                   | ≠                      | 0.38                          | 1.88                                   | ≠                                               | 1.88                                          |
| Alcohol swab                                                                                  | 5        | ≠                                                   | ≠                      | 0.02                          | 0.09                                   | ≠                                               | 0.09                                          |
| Needle                                                                                        | 5        | ≠                                                   | ≠                      | 0.04                          | 0.19                                   | ≠                                               | 0.19                                          |
| Duration of taking<br>RBG/FBG test                                                            | 5        | 0.07                                                | 1.03                   | 0.07                          | 0.35                                   | ≠                                               | 0.35                                          |
| <b>Second home visit</b>                                                                      |          |                                                     |                        |                               |                                        |                                                 |                                               |
| Telephone call                                                                                | 124      | 0.05                                                | 1.13                   | 0.06                          | ≠                                      | 7.00                                            | 7.00                                          |

| Activity                                          | Quantity | Time spent<br>in hours per<br>household<br>contacts | Cost per<br>hour (USD) | Cost per<br>quantity<br>(USD) | Total cost<br>for first<br>visit (USD) | Total cost<br>for second<br>home visit<br>(USD) | Total cost<br>for two<br>home visits<br>(USD) |
|---------------------------------------------------|----------|-----------------------------------------------------|------------------------|-------------------------------|----------------------------------------|-------------------------------------------------|-----------------------------------------------|
| Home visit for<br>contact tracing by<br>volunteer | 124      | 1.75                                                | 1.03                   | 1.80                          | ≠                                      | 223.51                                          | 223.51                                        |
| Travel cost for<br>volunteer                      | 124      | ≠                                                   | ≠                      | 1.13                          | ≠                                      | 140.06                                          | 140.06                                        |
| Mask                                              | 288      | ≠                                                   | ≠                      | 0.04                          | ≠                                      | 15.55                                           | 15.55                                         |
| <b>FBG test during second home visit</b>          |          |                                                     |                        |                               |                                        |                                                 |                                               |
| Glucometer                                        | 167      | ≠                                                   | ≠                      | 0.64                          | ≠                                      | 107.21                                          | 107.21                                        |
| Glucose strip                                     | 167      | ≠                                                   | ≠                      | 0.38                          | ≠                                      | 62.88                                           | 62.88                                         |
| Alcohol swab                                      | 167      | ≠                                                   | ≠                      | 0.02                          | ≠                                      | 3.02                                            | 3.02                                          |
| Needle                                            | 167      | ≠                                                   | ≠                      | 0.04                          | ≠                                      | 6.29                                            | 6.29                                          |
| <b>CXR examination after second home visit</b>    |          |                                                     |                        |                               |                                        |                                                 |                                               |
| Building                                          | 184      | ≠                                                   | ≠                      | 0.16                          | ≠                                      | 29.44                                           | 29.44                                         |
| Digital CXR with<br>portable generator            | 184      | ≠                                                   | ≠                      | 1.46                          | ≠                                      | 268.64                                          | 268.64                                        |
| Maintenance for<br>quality control                | 184      | ≠                                                   | ≠                      | 0.18                          | ≠                                      | 32.94                                           | 32.94                                         |
| Electricity                                       | 184      | ≠                                                   | ≠                      | 0.06                          | ≠                                      | 10.86                                           | 10.86                                         |
| CXR technician                                    | 184      | 0.56                                                | 1.20                   | 0.67                          | ≠                                      | 123.65                                          | 123.65                                        |
| CXR film                                          | 184      | ≠                                                   | ≠                      | 1.24                          | ≠                                      | 228.16                                          | 228.16                                        |

| Activity                                         | Quantity | Time spent<br>in hours per<br>household<br>contacts | Cost per<br>hour (USD) | Cost per<br>quantity<br>(USD) | Total cost<br>for first<br>visit (USD) | Total cost<br>for second<br>home visit<br>(USD) | Total cost<br>for two<br>home visits<br>(USD) |
|--------------------------------------------------|----------|-----------------------------------------------------|------------------------|-------------------------------|----------------------------------------|-------------------------------------------------|-----------------------------------------------|
| Masks                                            | 184      | ≠                                                   | ≠                      | 0.04                          | ≠                                      | 6.93                                            | 6.93                                          |
| Radiologist                                      | 184      | 0.08                                                | 1.50                   | 0.12                          | ≠                                      | 22.91                                           | 22.91                                         |
| Material used in 2nd<br>visit to TB clinic       | 184      | ≠                                                   | ≠                      | 0.85                          | ≠                                      | 156.40                                          | 156.40                                        |
| <b>Recheck CXR after second home visit</b>       |          |                                                     |                        |                               |                                        |                                                 |                                               |
| Building                                         | 31       | ≠                                                   | ≠                      | 0.16                          | ≠                                      | 4.96                                            | 4.96                                          |
| Digital CXR with<br>portable generator           | 31       | ≠                                                   | ≠                      | 1.46                          | ≠                                      | 45.26                                           | 45.26                                         |
| Maintenance for<br>quality control               | 31       | ≠                                                   | ≠                      | 0.18                          | ≠                                      | 5.55                                            | 5.55                                          |
| Electricity                                      | 31       | ≠                                                   | ≠                      | 0.06                          | ≠                                      | 1.83                                            | 1.83                                          |
| CXR technician                                   | 31       | 0.56                                                | 1.20                   | 0.67                          | ≠                                      | 20.83                                           | 20.83                                         |
| CXR film                                         | 31       | ≠                                                   | ≠                      | 1.24                          | ≠                                      | 38.44                                           | 38.44                                         |
| Antibiotic                                       | 31       | ≠                                                   | ≠                      | 4.50                          | ≠                                      | 139.50                                          | 139.50                                        |
| Masks                                            | 31       | ≠                                                   | ≠                      | 0.04                          | ≠                                      | 1.17                                            | 1.17                                          |
| Radiologist                                      | 31       | 0.08                                                | 1.50                   | 0.12                          | ≠                                      | 3.86                                            | 3.86                                          |
| <b>GeneXpert testing after second home visit</b> |          |                                                     |                        |                               |                                        |                                                 |                                               |
| Building space                                   | 17       | ≠                                                   | ≠                      | 0.12                          | ≠                                      | 2.01                                            | 2.01                                          |
| GeneXpert module<br>with computer                | 17       | ≠                                                   | ≠                      | 1.06                          | ≠                                      | 18.00                                           | 18.00                                         |

| Activity                                                                          | Quantity | Time spent<br>in hours per<br>household<br>contacts | Cost per<br>hour (USD) | Cost per<br>quantity<br>(USD) | Total cost<br>for first<br>visit (USD) | Total cost<br>for second<br>home visit<br>(USD) | Total cost<br>for two<br>home visits<br>(USD) |
|-----------------------------------------------------------------------------------|----------|-----------------------------------------------------|------------------------|-------------------------------|----------------------------------------|-------------------------------------------------|-----------------------------------------------|
| Calibration                                                                       | 17       | ≠                                                   | ≠                      | 0.27                          | ≠                                      | 4.51                                            | 4.51                                          |
| Electricity                                                                       | 17       | ≠                                                   | ≠                      | 0.27                          | ≠                                      | 4.51                                            | 4.51                                          |
| Medical technologist                                                              | 17       | 1.85                                                | 1.08                   | 2.00                          | ≠                                      | 33.97                                           | 33.97                                         |
| Xpert testing                                                                     | 17       | ≠                                                   | ≠                      | 11.33                         | ≠                                      | 192.61                                          | 192.61                                        |
| Masks                                                                             | 17       | ≠                                                   | ≠                      | 0.04                          | ≠                                      | 0.64                                            | 0.64                                          |
| <b>HIV test after second home visit</b>                                           |          |                                                     |                        |                               |                                        |                                                 |                                               |
| Test kit                                                                          | 5        | ≠                                                   | ≠                      | 1.12                          | ≠                                      | 5.60                                            | 5.60                                          |
| Duration of taking<br>test                                                        | 5        | 0.25                                                | 1.03                   | 0.26                          | ≠                                      | 1.29                                            | 1.29                                          |
| Needles                                                                           | 5        | ≠                                                   | ≠                      | 0.04                          | ≠                                      | 0.19                                            | 0.19                                          |
| Alcohol swab                                                                      | 5        | ≠                                                   | ≠                      | 0.02                          | ≠                                      | 0.09                                            | 0.09                                          |
| <b>Additional home visit for RBG/FBG test to ascertainment of undetermined DM</b> |          |                                                     |                        |                               |                                        |                                                 |                                               |
| Home visit for<br>contact tracing by<br>volunteer                                 | 5        | 1.50                                                | 1.03                   | 0.52                          | ≠                                      | 7.73                                            | 7.73                                          |
| Travel cost for<br>volunteer                                                      | 5        | ≠                                                   | ≠                      | 1.13                          | ≠                                      | 5.65                                            | 5.65                                          |
| Glucometer                                                                        | 5        | ≠                                                   | ≠                      | 0.64                          | ≠                                      | 3.21                                            | 3.21                                          |
| Glucose strip                                                                     | 5        | ≠                                                   | ≠                      | 0.38                          | ≠                                      | 1.88                                            | 1.88                                          |
| Alcohol swab                                                                      | 5        | ≠                                                   | ≠                      | 0.02                          | ≠                                      | 0.09                                            | 0.09                                          |

| Activity          | Quantity | Time spent<br>in hours per<br>household<br>contacts | Cost per<br>hour (USD) | Cost per<br>quantity<br>(USD) | Total cost<br>for first<br>visit (USD) | Total cost<br>for second<br>home visit<br>(USD) | Total cost<br>for two<br>home visits<br>(USD) |
|-------------------|----------|-----------------------------------------------------|------------------------|-------------------------------|----------------------------------------|-------------------------------------------------|-----------------------------------------------|
| Needle            | 5        | ≠                                                   | ≠                      | 0.04                          | ≠                                      | 0.19                                            | 0.19                                          |
| <b>Total cost</b> |          |                                                     |                        |                               | <b>3280.95</b>                         | <b>1989.02</b>                                  | <b>5269.97</b>                                |

*TB* tuberculosis, *DM* diabetes mellitus, *USD* US dollars, *RBG* random blood glucose, *FBG* fasting blood glucose, *CXR* chest X-ray, *HIV* human immunodeficiency virus, ≠ not applicable

## SUPPLEMENTARY FIGURE

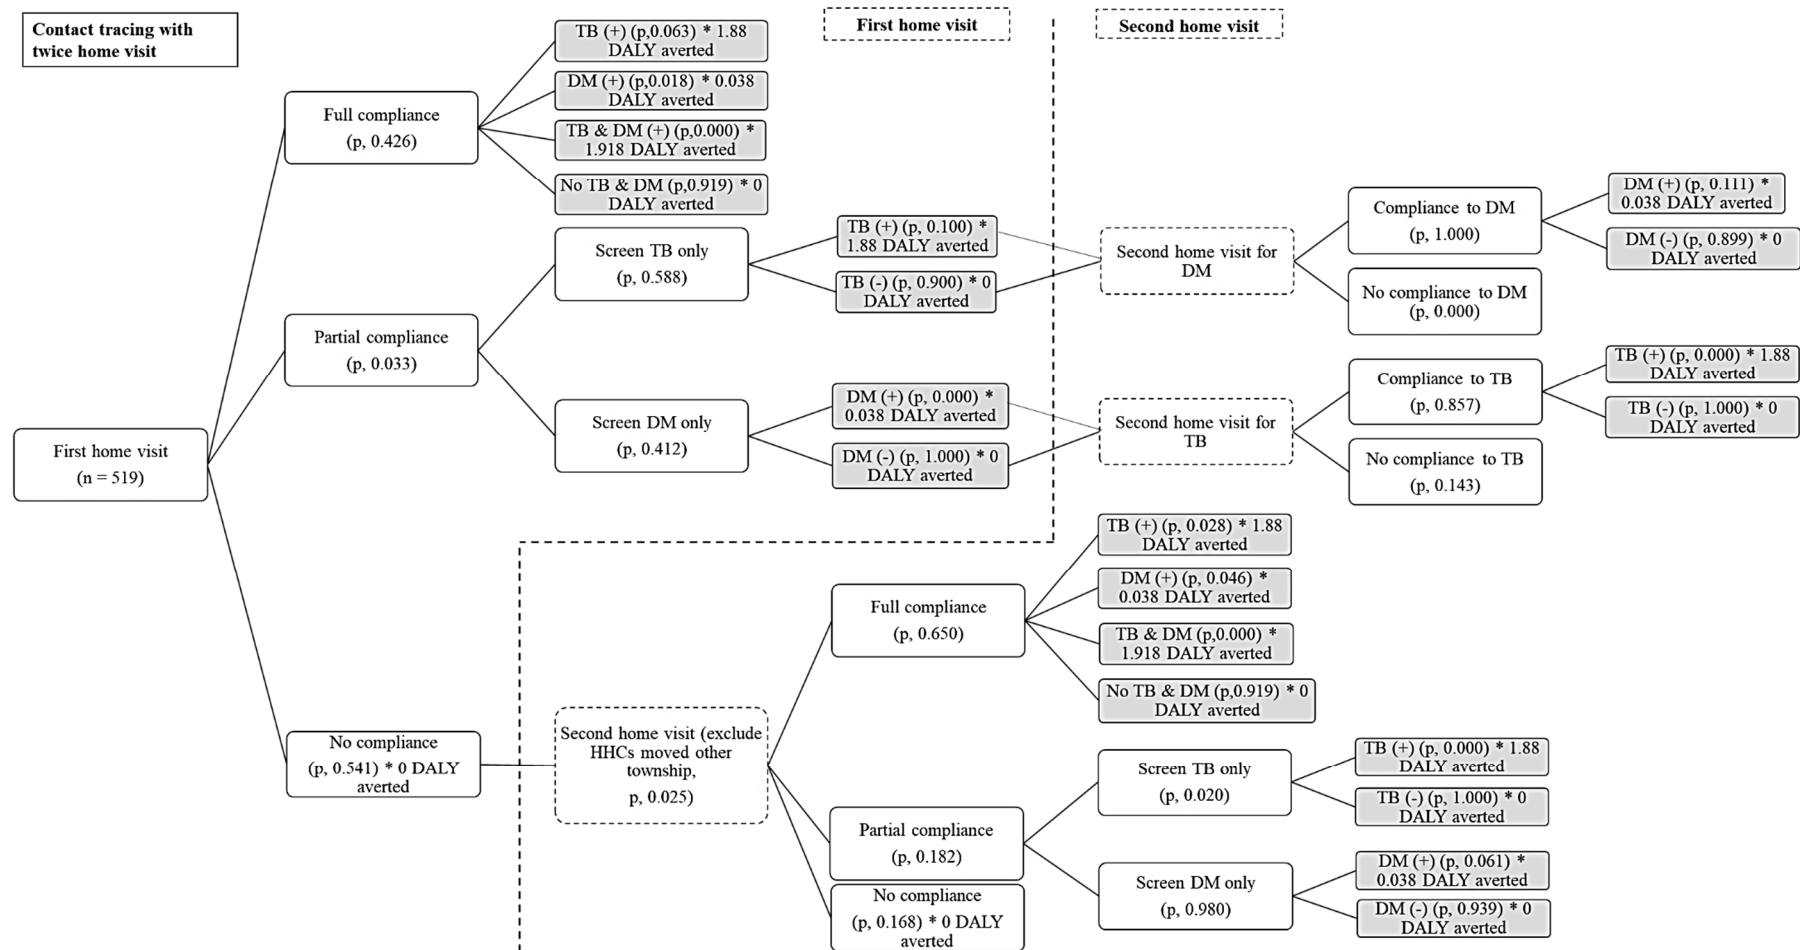

**Figure S1** Decision tree of contact tracing for the first and second home visits. *TB* tuberculosis, *DM* diabetes mellitus, *p* probability, *DALY* disability-adjusted life years
